# Supplementary material for: Residual oxygen groups in nitrogen-doped graphene to enhance the capacitive performance
Source: Royal Society of Chemistry journal article supplement (doi:10.1039/c6ra28596a), 2017-01-01
Supplement: c6ra28596a1.pdf [file c6ra28596a1.pdf]

## Supplementary Information

### Residual oxygen groups in nitrogen-doped graphene to enhance the capacitive performance

Mengying Yu<sup>a</sup>, Bingqiao Xie<sup>a</sup>, Yang Yang<sup>a</sup>, Yong Zhang<sup>b</sup>, Ying Chen<sup>a,\*</sup>, Weiye Yu<sup>a</sup>,

Shanshan Zhang<sup>a</sup>, Luhua Lu<sup>a,\*</sup>, Dong Liu<sup>c</sup>

<sup>a</sup> *Engineering Research Center of Nano-Geomaterials of Ministry of Education, China University of Geosciences, Wuhan 388 Lumo RD, Wuhan 430074, China*

<sup>b</sup> *School of Materials Science and Engineering, Hefei University of Technology, Hefei, 230009, China*

<sup>c</sup> *Key Laboratory of Mineralogy and Metallogeny/Guangdong Provincial Key Laboratory of Mineral Physics and Materials, Guangzhou Institute of Geochemistry, Chinese Academy of Sciences (CAS), Guangzhou 510640, China*

\*Corresponding author: Tel: +86-027-67884292(Y.Chen; L.H. Lu);  
E-mail addresses: [chenying@cug.edu.cn](mailto:chenying@cug.edu.cn), [lhlu@cug.edu.cn](mailto:lhlu@cug.edu.cn)(L.H. Lu).

#### Synthesis of graphene reduced by urea

The GO (0.05 g) was dispersed in deionised water (DI) (70mL), which contained 5g urea, followed by ultrasonic for 30min to make a homogeneous precursor solution. Then, the precursor solution was reacted under hydrothermal treatment for 12 h at 170°C, and black product was obtained. The mixture was washed several times with DI water to make the pH=7, and the as-prepared black product was allowed to dry by freeze-drying. The resultant powder was labelled as NG-U.

**Table S1:** pH values of the solution before and after the reaction

| Sample | pH                  |                    | $\Delta$ pH |
|--------|---------------------|--------------------|-------------|
|        | Before hydrothermal | After hydrothermal |             |
| NG1    | 7.78                | 7.42               | 0.36        |
| NG2    | 9.53                | 9.25               | 0.28        |
| NG3    | 13.94               | 13.79              | 0.15        |
| NG-U   | 7.43                | 9.31               | 1.88        |

**Table S2:** Comparison of specific capacitance of nitrogen-doped carbon-based materials

| Carbon type                     | N <sub>XPS</sub> (at.%) | Electrodes | Electrolyte                       | Current density (A g <sup>-1</sup> ) | Capacitance (F g <sup>-1</sup> ) | Ref.     |
|---------------------------------|-------------------------|------------|-----------------------------------|--------------------------------------|----------------------------------|----------|
| N-doped graphene                | 1.0                     | Three      | 6M KOH                            | 3                                    | 246                              | S1       |
| N-doped graphene                | 10.1                    | Three      | 6M KOH                            | 5                                    | 298                              | S2       |
| N- and O- carbon                | 4                       | Three      | 1M H <sub>2</sub> SO <sub>4</sub> | 1                                    | 390                              | S3       |
|                                 |                         |            |                                   | 10                                   | 218                              |          |
| N-doped graphene                | 10.13                   | Three      | 6M KOH                            | 0.2                                  | 326                              | S4       |
| N- Porous Carbon Spheres        | 3.55                    | Three      | 1M H <sub>2</sub> SO <sub>4</sub> | 1                                    | 388                              | S5       |
|                                 |                         |            |                                   | 20                                   | 272                              |          |
| N-doped graphene                | 6.85                    | Two        | 1M H <sub>2</sub> SO <sub>4</sub> | 1                                    | 242                              | S6       |
|                                 |                         |            |                                   | 20                                   | 200                              |          |
| N-doped graphene                | 5.86                    | Three      | 6M KOH                            | 1                                    | 326                              | S7       |
| Hierarchical porous carbons     | 1.62                    | Three      | 6M KOH                            | 0.5                                  | 314                              | S8       |
|                                 |                         |            |                                   | 20                                   | 237                              |          |
| N-doped egg-box-like carbons    | 1.3                     | Three      | 6M KOH                            | 0.5                                  | 355                              | S9       |
|                                 |                         |            |                                   | 50                                   | 230                              |          |
| N-doped porous graphitic carbon | 7.72                    | Three      | 6M KOH                            | 1                                    | 293                              | S10      |
|                                 |                         |            |                                   | 30                                   | 157                              |          |
| N-doped carbon nanocages        | 7.9                     | Two        | 6M KOH                            | 1                                    | 313                              | S11      |
|                                 |                         |            |                                   | 100                                  | 234                              |          |
| N-doped porous carbon           | 6.2                     | Three      | 2M KOH                            | 0.5                                  | 255                              | S12      |
|                                 |                         |            |                                   | 10                                   | 192                              |          |
| N-doped graphene                | 7.71                    | Three      | 6M KOH                            | 0.5                                  | 334                              | S13      |
|                                 |                         |            |                                   | 20                                   | 210                              |          |
| N-doped graphene                | 8.56                    | Three      | 6M KOH                            | 1                                    | 399                              | Our work |
|                                 |                         |            |                                   | 20                                   | 290.8                            |          |
|                                 |                         |            |                                   | 5                                    | 280                              |          |

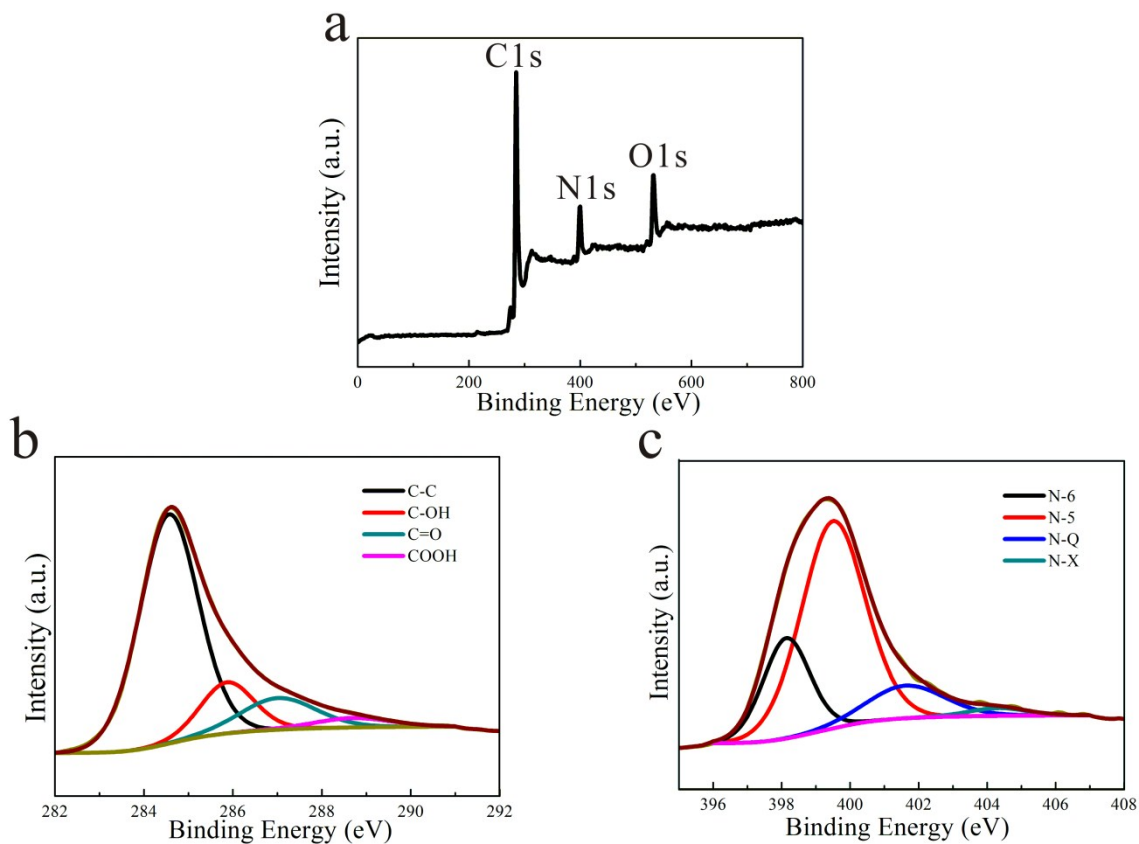

**Figure S1** XPS survey (a), high resolution C 1s peak (b) and high resolution N 1s peak (c) of NG-U

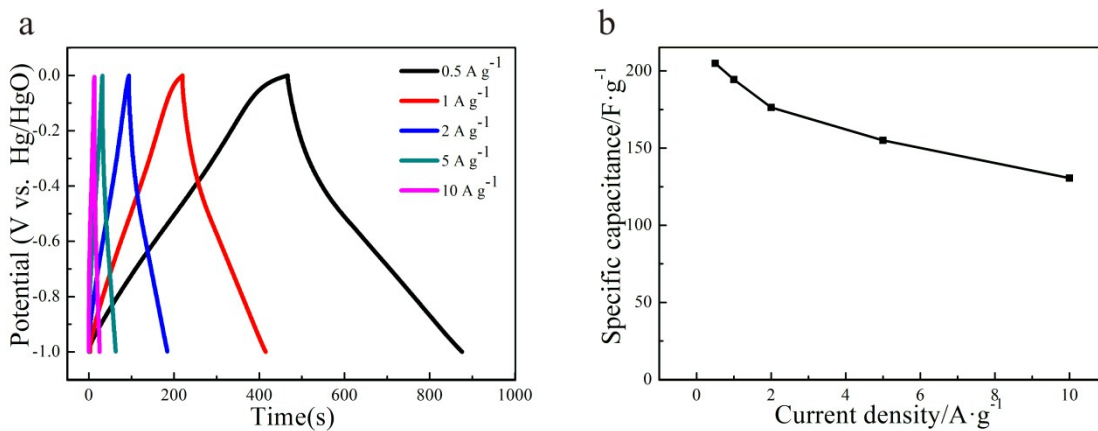

**Figure S2** GCD curves (a) and the specific capacitance (b) at various current densities of NG-U.

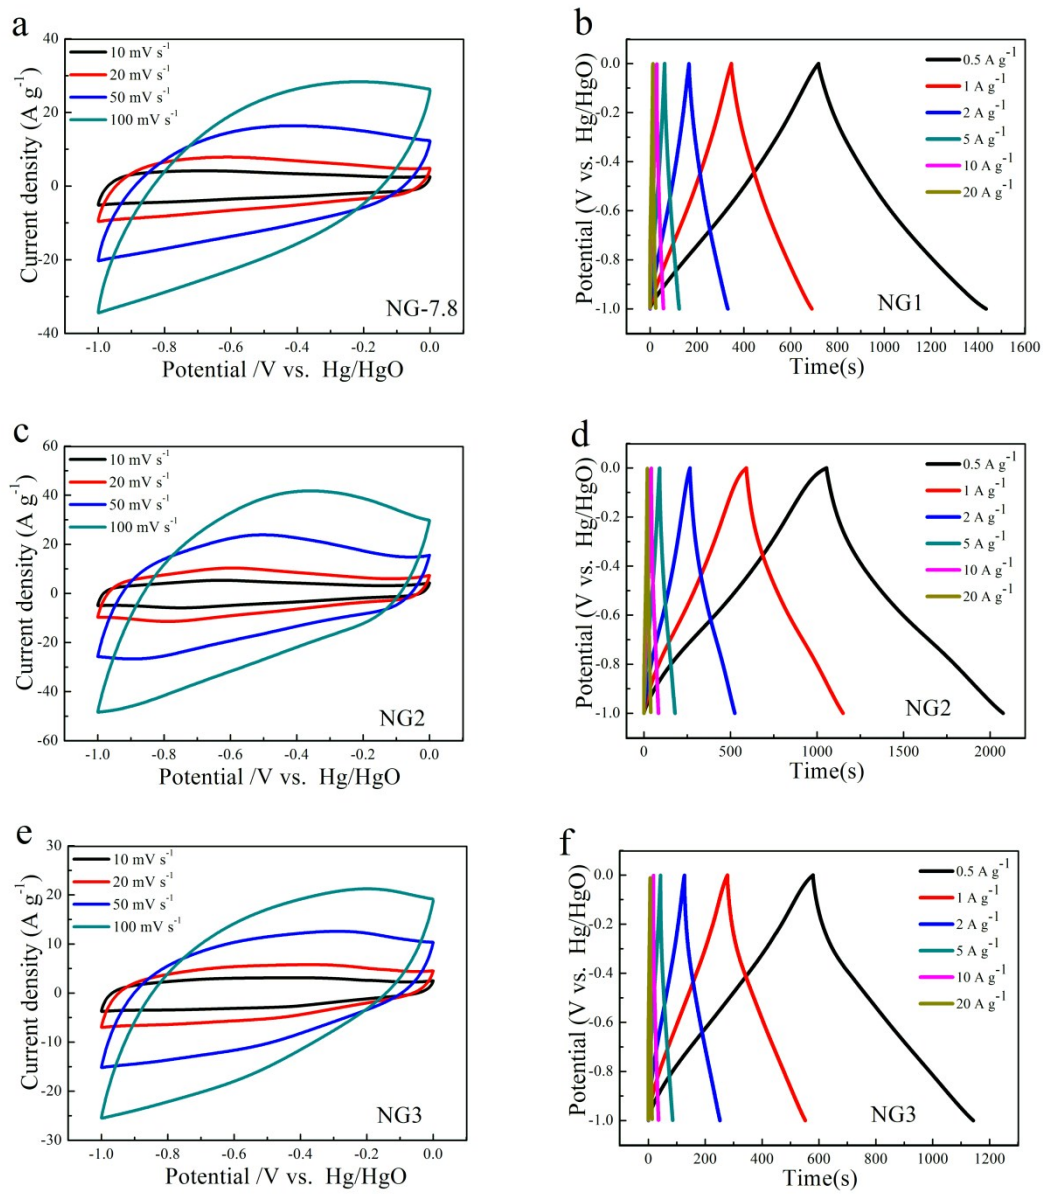

**Figure S3** CV curves at various scanning rates and GCD curves at different current densities of NG1(a, b), NG2(c, d) and NG3(e, f).

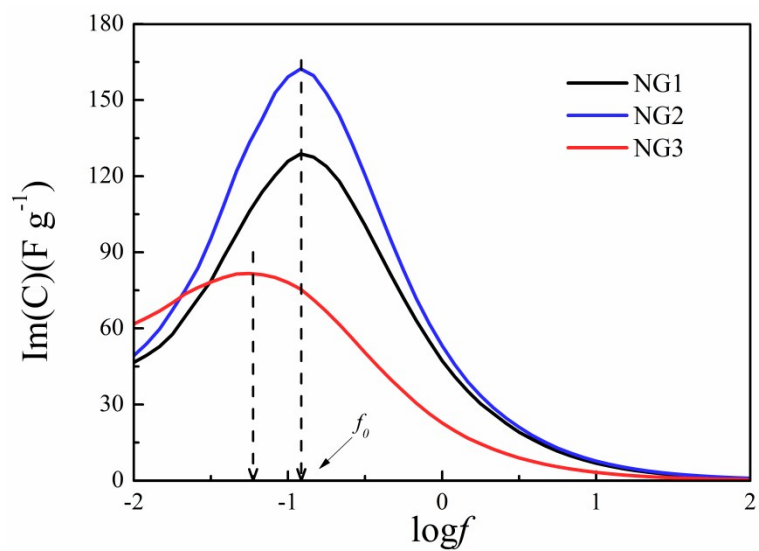

**Fig.S4** Variation of the imaginary part of capacitance,  $\text{Im}(C)$ , with the modulation frequency for NGs based on the impedance data shown in Fig. 5a

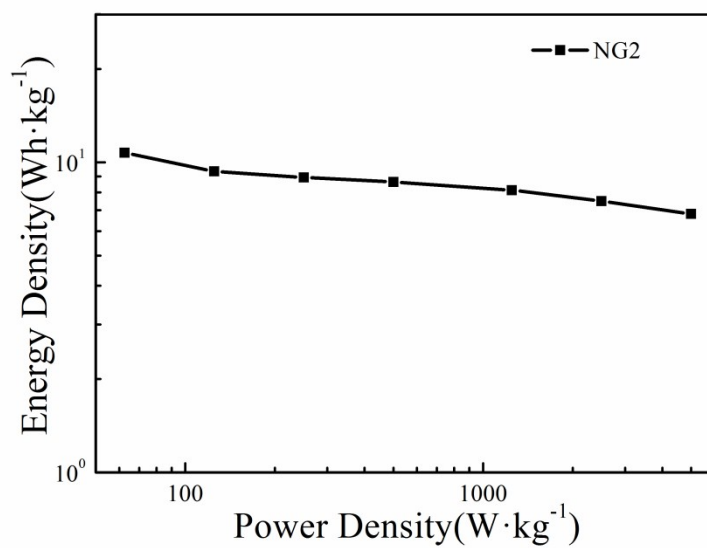

**Fig.S5** Rogone plot for the devices

## References

- S1. T. Wang, L. Wang, D. Wu, W. Xia, H. Zhao and D. Jia, *Journal of Materials Chemistry A*, 2014, **2**, 8352.
- S2. H. Zhang, T. Kuila, N. H. Kim, D. S. Yu and J. H. Lee, *Carbon*, 2014, **69**, 66-78.
- S3. L. Zhou, H. Cao, S. Zhu, L. Hou and C. Yuan, *Green Chem.*, 2015, **17**, 2373-2382.
- S4. L. Sun, L. Wang, C. Tian, T. Tan, Y. Xie, K. Shi, M. Li and H. Fu, *RSC Advances*, 2012, **2**, 4498.
- S5. N. P. Wickramaratne, J. T. Xu, M. Wang, L. Zhu, L. M. Dai and M. Jaroniec, *Chemistry Of Materials*, 2014, **26**, 2820-2828.
- S6. D. Wang, Y. Min, Y. Yu and B. Peng, *Journal of colloid and interface science*, 2014, **417**, 270-277.
- S7. H. L. Guo, P. Su, X. F. Kang and S. K. Ning, *Journal Of Materials Chemistry A*, 2013, **1**, 2248-2255.
- S8. L. Yao, G. Z. Yang, P. Han, Z. H. Tang and J. H. Yang, *Journal Of Power Sources*, 2016, **315**, 209-217.
- S9. Y. Cai, Y. Luo, Y. Xiao, X. Zhao, Y. Liang, H. Hu, H. Dong, L. Sun, Y. Liu and M. Zheng, *ACS applied materials & interfaces*, 2016, **8**, 33060-33071.
- S10. L. Sun, C. Tian, Y. Fu, Y. Yang, J. Yin, L. Wang and H. Fu, *Chemistry – A European Journal*, 2014, **20**, 564-574.
- S11. J. Zhao, H. Lai, Z. Lyu, Y. Jiang, K. Xie, X. Wang, Q. Wu, L. Yang, Z. Jin, Y. Ma, J. Liu and Z. Hu, *Advanced Materials*, 2015, **27**, 3541-3545.
- S12. G. Ma, Q. Yang, K. Sun, H. Peng, F. Ran, X. Zhao and Z. Lei, *Bioresour. Technol.*, 2015, **197**, 137-142.
- S13. X. Zhao, H. Dong, Y. Xiao, H. Hu, Y. Cai, Y. Liang, L. Sun, Y. Liu and M. Zheng, *Electrochimica Acta*, 2016, **218**, 32-40.
